# Supplementary material
Source: publisher site journal article supplement (https://www.kjim.org/upload/media/kjim-2020-386-suppl3.pdf)
Supplement: Supplementary file 1 [file kjim-2020-386-suppl3.pdf]

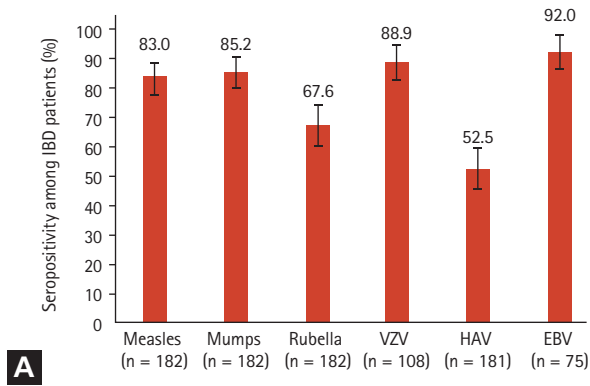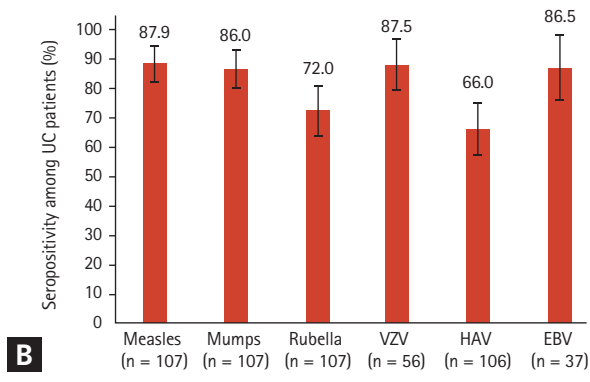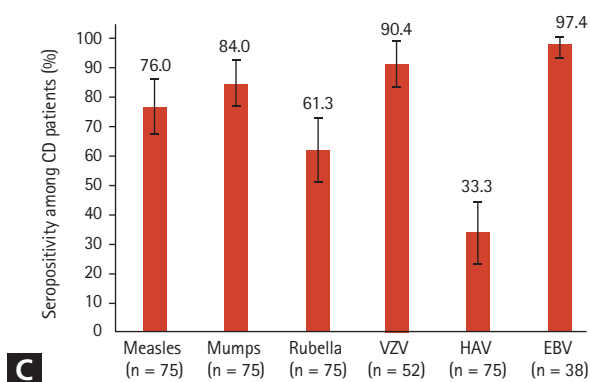

**Supplementary Figure 1.** Seropositivity of viruses among the subgroup who were not receiving immunosuppressive therapy. (A) Inflammatory bowel disease (IBD) patients, (B) ulcerative colitis (UC) patients, (C) Crohn's disease (CD) patients. The error bars denote 95% confidence intervals. VZV, varicella zoster virus; HAV, hepatitis A virus; EBV, Epstein-Barr virus.
